# Supplementary material for: Toll-like receptor 5 gene polymorphism is associated with breast cancer susceptibility
Source: PubMed Central journal article supplement (PMC5687632; doi:10.18632/oncotarget.20242), 2017-08-14
Supplement: oncotarget-08-88622-s001.pdf [file oncotarget-08-88622-s001.pdf]

## Toll-like receptor 5 gene polymorphism is associated with breast cancer susceptibility

### SUPPLEMENTARY MATERIALS

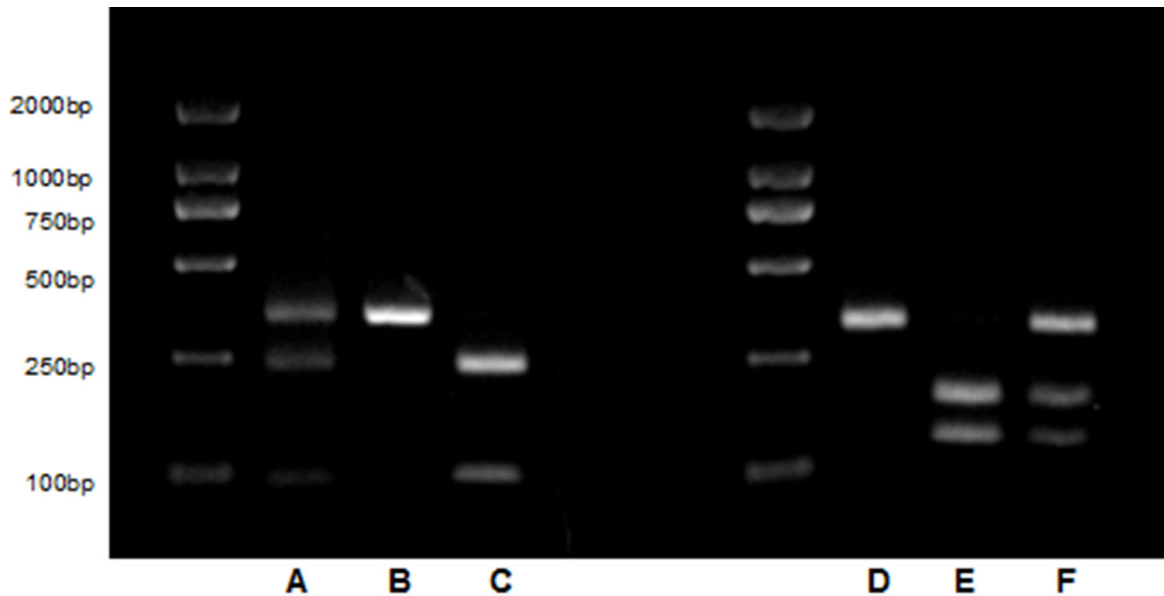

**A-C. rs5744168 CT/CC/TT genotype**

**D-F. rs2072493 GG/GA/AA genotype**

Supplementary Figure 1: PCR-RFLP results for rs2072493 and rs5744168.

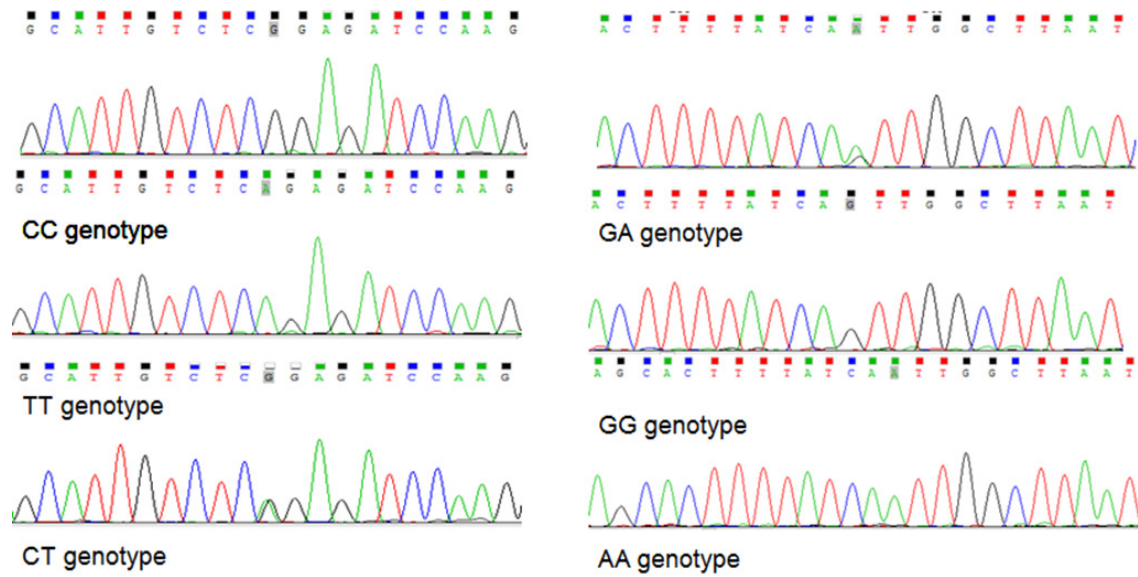

Sequence results of rs2072493 and rs5744168

Supplementary Figure 2: Sequencing results for rs2072493 and rs5744168.

**Supplementary Table 1: Supplement information for PCR-RFLP genotyping**

| SNP       | Primer                       | Annealing temperature | Restriction enzyme |
|-----------|------------------------------|-----------------------|--------------------|
| rs2072493 | 5'-GACTAAGCCTCAACTCCAACA-3'  | 58.0                  | MfeI               |
|           | 5'-GACTTCCTCTTCATCACAACC-3'  |                       |                    |
| rs5744168 | 5'-GGTAGCCTACATTGATTGC-3'    | 56.8                  | DdeI               |
|           | 5'-GGATTCTCTGAAGGGGTTTGAT-3' |                       |                    |
